# Supplementary material
Source: PubMed Central journal article supplement (PMC2738781)
Supplement: NIHMS136199-supplement-1_si_001.pdf [file NIHMS136199-supplement-1_si_001.pdf]

# Supporting Information

## Fundamental Reaction Mechanism and Free Energy Profile for (-)-Cocaine Hydrolysis Catalyzed by Cocaine Esterase

Junjun Liu<sup>1,2</sup>, Adel Hamza<sup>2</sup>, and Chang-Guo Zhan<sup>2,\*</sup>

<sup>1</sup>Key Laboratory of Pesticide and Chemical Biology of Ministry of Education, College of Chemistry, Central China Normal University, Wuhan 430079, P. R. China

<sup>2</sup>Department of Pharmaceutical Sciences, College of Pharmacy, University of Kentucky, 725 Rose Street, Lexington, KY 40536

**Supporting Information Available.** Absolute QM/MM energies (in Hartree) calculated at the QM/MM(MP2/6-31+G\*:AMBER) level, coordinates of QM part of the geometries optimized at the QM/MM(B3LYP/6-31G\*:AMBER) level, and complete citations of references 45 and 48. This material is available free of charge *via* the Internet at <http://pubs.acs.org>.

Table S1. Absolute QM/MM energies (in Hartree) calculated at the QM/MM(MP2/6-31+G\*:AMBER) level (single-point energy calculations) using the geometries optimized at the QM/MM(B3LYP/6-31G\*:AMBER) level.

| State | QM/MM        | State | QM/MM        | State | QM/MM        |
|-------|--------------|-------|--------------|-------|--------------|
| ES    | -1735.597344 | INT1' | -1735.586793 | TS3   | -1143.272341 |
| TS1   | -1735.582760 | TS2'  | -1735.586642 | INT3  | -1143.277382 |
| INT1  | -1735.592940 | INT2  | -1735.595766 | TS4   | -1143.270944 |
| TS2   | -1735.583555 | INT2' | -1143.308383 | PD    | -1143.282906 |

---

\* Corresponding author. E-mail: zhan@uky.edu

Coordinates of the QM part of the geometries optimized at the QM/MM(B3LYP/6-31G\*:AMBER) level. Atom “F” represents the one-free-valence boundary atom described by pseudopotential in QM subsystem.

ES

|   |           |           |           |
|---|-----------|-----------|-----------|
| F | 0.313496  | 2.523484  | 4.068776  |
| C | -0.237452 | 1.782143  | 2.856556  |
| H | 0.159462  | 0.751370  | 2.804528  |
| H | -1.339948 | 1.709827  | 2.908642  |
| O | 0.083934  | 2.419748  | 1.659001  |
| H | 0.752248  | 1.876671  | 1.167784  |
| F | 8.439599  | -0.617652 | -1.196511 |
| C | 7.869420  | -0.729460 | 0.225048  |
| H | 8.212368  | -1.659779 | 0.733853  |
| H | 8.215793  | 0.087717  | 0.888734  |
| C | 6.348306  | -0.823288 | 0.363525  |
| O | 5.738642  | -1.381098 | -0.598392 |
| O | 5.856086  | -0.400531 | 1.437532  |
| F | 2.331472  | -3.825727 | -1.255190 |
| C | 1.877480  | -2.500738 | -1.939916 |
| H | 2.447351  | -2.388548 | -2.875387 |
| H | 0.821856  | -2.542452 | -2.248390 |
| C | 2.004111  | -1.272775 | -1.099905 |
| N | 3.133259  | -0.930422 | -0.378369 |
| H | 4.127697  | -1.276535 | -0.462363 |
| C | 2.838735  | 0.163641  | 0.356290  |
| H | 3.562412  | 0.594337  | 1.033962  |
| N | 1.590718  | 0.570886  | 0.162048  |
| C | 1.068633  | -0.322198 | -0.747810 |
| H | 0.054454  | -0.232916 | -1.104069 |
| C | -1.977920 | 2.218524  | 0.104943  |
| O | -1.871867 | 0.940572  | -0.385006 |

|   |           |           |           |
|---|-----------|-----------|-----------|
| C | -2.999570 | 0.084015  | -0.189168 |
| C | -2.830836 | -0.994993 | 0.926113  |
| C | -1.528033 | -1.791709 | 0.911973  |
| O | -0.711458 | -1.486705 | 1.891968  |
| C | 0.511318  | -2.264853 | 1.994085  |
| H | 0.273673  | -3.211956 | 2.484540  |
| H | 0.935457  | -2.429090 | 1.005741  |
| H | 1.189083  | -1.667258 | 2.597226  |
| O | -1.300507 | -2.688173 | 0.099940  |
| H | -2.887767 | -0.489509 | 1.893116  |
| C | -4.029515 | -1.986730 | 0.823181  |
| N | -3.977179 | -2.652001 | -0.550255 |
| C | -4.757593 | -3.925738 | -0.650306 |
| H | -4.800196 | -4.222212 | -1.699731 |
| H | -4.238774 | -4.690402 | -0.071296 |
| H | -5.759992 | -3.780436 | -0.251087 |
| H | -2.985711 | -2.868626 | -0.745139 |
| C | -4.466766 | -1.539906 | -1.464269 |
| C | -5.707424 | -1.020014 | -0.710123 |
| C | -5.409714 | -1.294261 | 0.795281  |
| H | -5.397026 | -0.379309 | 1.391260  |
| H | -6.165199 | -1.949816 | 1.232114  |
| H | -6.608222 | -1.546031 | -1.036196 |
| H | -5.867059 | 0.040753  | -0.913799 |
| H | -4.680006 | -1.971293 | -2.443052 |
| C | -3.329588 | -0.517448 | -1.559070 |
| H | -2.436219 | -0.976261 | -1.996298 |
| H | -3.628975 | 0.286120  | -2.239572 |
| H | -3.939586 | -2.764756 | 1.582441  |
| H | -3.825942 | 0.712250  | 0.148620  |
| O | -2.740597 | 2.464468  | 1.029489  |

|   |           |          |           |
|---|-----------|----------|-----------|
| C | -1.227075 | 3.217575 | -0.688487 |
| C | -1.082117 | 4.509834 | -0.159801 |
| H | -1.437422 | 4.705418 | 0.843112  |
| C | -0.458544 | 5.506738 | -0.899723 |
| H | -0.360077 | 6.505665 | -0.486160 |
| C | 0.037064  | 5.223335 | -2.177135 |
| H | 0.522091  | 6.003855 | -2.756362 |
| C | -0.095037 | 3.936969 | -2.703110 |
| H | 0.290911  | 3.713510 | -3.692650 |
| C | -0.720935 | 2.931454 | -1.965045 |
| H | -0.810967 | 1.932573 | -2.376803 |

TS1

|   |           |           |           |
|---|-----------|-----------|-----------|
| F | 0.220403  | 2.430515  | 4.012603  |
| C | -0.389549 | 1.638592  | 2.829174  |
| H | -0.005452 | 0.597508  | 2.869748  |
| H | -1.488359 | 1.586358  | 2.932007  |
| O | -0.110669 | 2.118085  | 1.549678  |
| H | 0.736855  | 1.297999  | 0.839809  |
| F | 8.445358  | -0.538649 | -1.162602 |
| C | 7.829449  | -0.659898 | 0.237321  |
| H | 8.117091  | -1.616553 | 0.726988  |
| H | 8.193819  | 0.125792  | 0.928003  |
| C | 6.301499  | -0.679426 | 0.348028  |
| O | 5.668842  | -1.160741 | -0.645648 |
| O | 5.813570  | -0.280667 | 1.431460  |
| F | 2.387006  | -3.747348 | -1.311860 |
| C | 1.943420  | -2.407108 | -1.977020 |
| H | 2.557608  | -2.243559 | -2.875376 |
| H | 0.908295  | -2.464414 | -2.341958 |
| C | 1.983865  | -1.192984 | -1.096231 |

|   |           |           |           |
|---|-----------|-----------|-----------|
| N | 3.082613  | -0.762195 | -0.364199 |
| H | 4.121811  | -1.032159 | -0.465926 |
| C | 2.702149  | 0.259204  | 0.417261  |
| H | 3.366201  | 0.750564  | 1.113023  |
| N | 1.407718  | 0.530892  | 0.228841  |
| C | 0.955562  | -0.364521 | -0.719132 |
| H | -0.065460 | -0.348781 | -1.050964 |
| C | -1.710359 | 2.215481  | 0.481391  |
| O | -1.674757 | 0.859251  | -0.030767 |
| C | -2.876674 | 0.118832  | -0.019485 |
| C | -2.820424 | -1.088814 | 0.980536  |
| C | -1.516426 | -1.873458 | 0.936373  |
| O | -0.703839 | -1.620067 | 1.938772  |
| C | 0.527732  | -2.378520 | 1.990453  |
| H | 0.318979  | -3.353050 | 2.438031  |
| H | 0.942761  | -2.496801 | 0.991851  |
| H | 1.204403  | -1.800928 | 2.614882  |
| O | -1.251938 | -2.703857 | 0.065800  |
| H | -2.917773 | -0.686682 | 1.991476  |
| C | -4.010959 | -2.050745 | 0.721996  |
| N | -3.897188 | -2.571259 | -0.706981 |
| C | -4.671595 | -3.826777 | -0.955446 |
| H | -4.627445 | -4.059968 | -2.018836 |
| H | -4.208650 | -4.632310 | -0.383999 |
| H | -5.705463 | -3.698450 | -0.640051 |
| H | -2.901161 | -2.776518 | -0.882976 |
| C | -4.338193 | -1.361958 | -1.521892 |
| C | -5.612169 | -0.918457 | -0.778264 |
| C | -5.385510 | -1.348462 | 0.702059  |
| H | -5.395158 | -0.498128 | 1.386468  |
| H | -6.162360 | -2.039882 | 1.034447  |

|   |           |           |           |
|---|-----------|-----------|-----------|
| H | -6.496020 | -1.405521 | -1.199247 |
| H | -5.761445 | 0.158125  | -0.875988 |
| H | -4.504130 | -1.690615 | -2.549470 |
| C | -3.191678 | -0.341951 | -1.458751 |
| H | -2.298249 | -0.770972 | -1.928597 |
| H | -3.463473 | 0.530639  | -2.062024 |
| H | -3.962788 | -2.905034 | 1.398822  |
| H | -3.677095 | 0.769121  | 0.345149  |
| O | -2.650185 | 2.522559  | 1.228547  |
| C | -1.129338 | 3.174450  | -0.531424 |
| C | -1.088464 | 4.537133  | -0.204714 |
| H | -1.433622 | 4.847483  | 0.774646  |
| C | -0.611874 | 5.476032  | -1.116904 |
| H | -0.604485 | 6.530207  | -0.856216 |
| C | -0.158325 | 5.067122  | -2.375717 |
| H | 0.205086  | 5.799460  | -3.091550 |
| C | -0.190751 | 3.712759  | -2.705778 |
| H | 0.170292  | 3.377070  | -3.674252 |
| C | -0.677539 | 2.771114  | -1.794326 |
| H | -0.702794 | 1.724936  | -2.074592 |

INT1

|   |           |           |           |
|---|-----------|-----------|-----------|
| F | 0.140179  | 2.464412  | 3.966170  |
| C | -0.518861 | 1.669435  | 2.822024  |
| H | -0.058881 | 0.666614  | 2.773659  |
| H | -1.598182 | 1.555067  | 2.976340  |
| O | -0.343188 | 2.229807  | 1.527991  |
| H | 0.825414  | 1.243359  | 0.632350  |
| F | 8.447490  | -0.450460 | -1.126049 |
| C | 7.819705  | -0.556156 | 0.271087  |
| H | 8.112262  | -1.502555 | 0.776655  |

|   |           |           |           |
|---|-----------|-----------|-----------|
| H | 8.169545  | 0.242722  | 0.954429  |
| C | 6.292316  | -0.586986 | 0.375441  |
| O | 5.669894  | -1.103397 | -0.610509 |
| O | 5.789452  | -0.164384 | 1.441664  |
| F | 2.432536  | -3.750255 | -1.277256 |
| C | 1.985218  | -2.430676 | -1.971535 |
| H | 2.600499  | -2.276899 | -2.870258 |
| H | 0.951456  | -2.498520 | -2.335935 |
| C | 2.017138  | -1.202317 | -1.114572 |
| N | 3.110779  | -0.745688 | -0.385306 |
| H | 4.172935  | -1.004714 | -0.466655 |
| C | 2.729064  | 0.288660  | 0.367010  |
| H | 3.377375  | 0.804725  | 1.059366  |
| N | 1.431690  | 0.534436  | 0.147797  |
| C | 0.974949  | -0.382815 | -0.772719 |
| H | -0.054230 | -0.380008 | -1.077137 |
| C | -1.603265 | 2.273686  | 0.678177  |
| O | -1.582235 | 0.770412  | 0.120209  |
| C | -2.800430 | 0.102082  | 0.041723  |
| C | -2.811589 | -1.144739 | 1.009598  |
| C | -1.503181 | -1.914426 | 0.967100  |
| O | -0.691273 | -1.655527 | 1.974862  |
| C | 0.541581  | -2.404519 | 2.027927  |
| H | 0.341815  | -3.382602 | 2.472527  |
| H | 0.963003  | -2.521129 | 1.031507  |
| H | 1.214643  | -1.828052 | 2.658117  |
| O | -1.212628 | -2.731655 | 0.089765  |
| H | -2.931816 | -0.768639 | 2.027771  |
| C | -3.993730 | -2.095149 | 0.700520  |
| N | -3.842186 | -2.578394 | -0.737018 |
| C | -4.604475 | -3.828555 | -1.034565 |

|   |           |           |           |
|---|-----------|-----------|-----------|
| H | -4.484576 | -4.069672 | -2.089585 |
| H | -4.192184 | -4.634876 | -0.426135 |
| H | -5.658446 | -3.691765 | -0.799738 |
| H | -2.842136 | -2.777832 | -0.889920 |
| C | -4.258224 | -1.344825 | -1.532455 |
| C | -5.550079 | -0.917759 | -0.811097 |
| C | -5.365895 | -1.390225 | 0.661782  |
| H | -5.392511 | -0.558273 | 1.367655  |
| H | -6.152782 | -2.089821 | 0.952334  |
| H | -6.424532 | -1.388490 | -1.269660 |
| H | -5.690009 | 0.161908  | -0.881101 |
| H | -4.400409 | -1.650983 | -2.571026 |
| C | -3.109363 | -0.330081 | -1.415920 |
| H | -2.213466 | -0.756697 | -1.885280 |
| H | -3.365143 | 0.557324  | -2.004416 |
| H | -3.968008 | -2.968100 | 1.355198  |
| H | -3.591897 | 0.772816  | 0.403248  |
| O | -2.670349 | 2.554026  | 1.292620  |
| C | -1.161824 | 3.160996  | -0.497234 |
| C | -1.169974 | 4.547486  | -0.285359 |
| H | -1.521314 | 4.925124  | 0.668690  |
| C | -0.733634 | 5.431240  | -1.271440 |
| H | -0.760082 | 6.501563  | -1.089708 |
| C | -0.277804 | 4.944434  | -2.501132 |
| H | 0.059135  | 5.631363  | -3.273082 |
| C | -0.278216 | 3.568794  | -2.727720 |
| H | 0.082636  | 3.167560  | -3.671714 |
| C | -0.721499 | 2.685345  | -1.737624 |
| H | -0.718878 | 1.621899  | -1.939506 |

TS2



|   |           |           |           |
|---|-----------|-----------|-----------|
| F | 0.400595  | 2.423470  | 3.772665  |
| C | -0.439108 | 1.676945  | 2.750662  |
| H | -0.073484 | 0.644734  | 2.610443  |
| H | -1.500100 | 1.629160  | 3.006403  |
| O | -0.303409 | 2.285902  | 1.475080  |
| H | 0.305293  | 0.824518  | 0.573967  |
| F | 8.056299  | -0.990851 | -1.457423 |
| C | 7.947459  | -0.906956 | 0.077348  |
| H | 8.009840  | -1.913193 | 0.542697  |
| H | 8.760654  | -0.328895 | 0.538406  |
| C | 6.618942  | -0.333139 | 0.548038  |
| O | 5.603510  | -0.859273 | -0.017693 |
| O | 6.631530  | 0.572436  | 1.410049  |
| F | 3.093704  | -3.598725 | -1.418960 |
| C | 2.727063  | -2.173533 | -1.898053 |
| H | 3.591969  | -1.691783 | -2.381833 |
| H | 1.939231  | -2.204488 | -2.664988 |
| C | 2.270734  | -1.203861 | -0.885826 |
| N | 3.098146  | -0.536479 | 0.006992  |
| H | 4.206817  | -0.638389 | 0.103833  |
| C | 2.362810  | 0.342235  | 0.683761  |
| H | 2.722111  | 1.035497  | 1.431124  |
| N | 1.096737  | 0.255520  | 0.262440  |
| C | 1.014535  | -0.694158 | -0.717922 |
| H | 0.089654  | -0.914224 | -1.220559 |
| C | -1.493627 | 2.544204  | 0.806295  |
| O | -1.605370 | 0.620924  | 0.149848  |
| C | -2.841691 | 0.069135  | 0.103706  |
| C | -2.928750 | -1.256863 | 0.983324  |
| C | -1.708310 | -2.131353 | 0.771014  |
| O | -0.902641 | -2.214207 | 1.826796  |

|   |           |           |           |
|---|-----------|-----------|-----------|
| C | 0.224548  | -3.109470 | 1.704755  |
| H | -0.122384 | -4.114259 | 1.455206  |
| H | 0.915299  | -2.757820 | 0.937819  |
| H | 0.704316  | -3.114138 | 2.679788  |
| O | -1.498929 | -2.757139 | -0.269332 |
| H | -2.956680 | -0.961691 | 2.035112  |
| C | -4.203342 | -2.080339 | 0.676004  |
| N | -4.147200 | -2.454651 | -0.802620 |
| C | -5.000171 | -3.618062 | -1.174259 |
| H | -4.924836 | -3.776996 | -2.250900 |
| H | -4.635482 | -4.503130 | -0.652940 |
| H | -6.035300 | -3.426066 | -0.893029 |
| H | -3.154209 | -2.692550 | -1.000444 |
| C | -4.515767 | -1.134383 | -1.473656 |
| C | -5.720881 | -0.653716 | -0.637939 |
| C | -5.513851 | -1.276927 | 0.770954  |
| H | -5.443923 | -0.516093 | 1.549538  |
| H | -6.342429 | -1.938692 | 1.036696  |
| H | -6.666594 | -0.981073 | -1.080044 |
| H | -5.741429 | 0.436011  | -0.594709 |
| H | -4.766186 | -1.351158 | -2.516868 |
| C | -3.284522 | -0.230425 | -1.362447 |
| H | -2.442660 | -0.681878 | -1.902263 |
| H | -3.497202 | 0.723629  | -1.856508 |
| H | -4.229105 | -3.004198 | 1.251357  |
| H | -3.597495 | 0.745053  | 0.553095  |
| O | -2.523247 | 2.747772  | 1.460601  |
| C | -1.137161 | 3.275694  | -0.466437 |
| C | -1.179426 | 4.674099  | -0.390783 |
| H | -1.580047 | 5.145384  | 0.501624  |
| C | -0.678258 | 5.456315  | -1.430599 |

|   |           |          |           |
|---|-----------|----------|-----------|
| H | -0.693941 | 6.537155 | -1.339989 |
| C | -0.144654 | 4.848457 | -2.569738 |
| H | 0.261102  | 5.458629 | -3.372195 |
| C | -0.134359 | 3.454726 | -2.663640 |
| H | 0.273028  | 2.965433 | -3.544996 |
| C | -0.620995 | 2.669503 | -1.616856 |
| H | -0.603855 | 1.589646 | -1.678085 |

INT1'

|   |           |           |           |
|---|-----------|-----------|-----------|
| F | 0.489210  | 2.457283  | 3.784942  |
| C | -0.313776 | 1.775630  | 2.692960  |
| H | 0.081683  | 0.772759  | 2.487695  |
| H | -1.381144 | 1.691273  | 2.908405  |
| O | -0.147211 | 2.461938  | 1.451324  |
| H | -0.183284 | 0.311668  | 0.438241  |
| F | 7.994239  | -1.255171 | -1.424244 |
| C | 7.824191  | -1.155487 | 0.102649  |
| H | 7.774853  | -2.163096 | 0.569575  |
| H | 8.672414  | -0.660309 | 0.597541  |
| C | 6.541788  | -0.451975 | 0.549349  |
| O | 5.489172  | -0.766290 | -0.095068 |
| O | 6.639120  | 0.359863  | 1.497217  |
| F | 2.990206  | -3.741990 | -1.386291 |
| C | 2.780386  | -2.285686 | -1.878067 |
| H | 3.735971  | -1.820490 | -2.170051 |
| H | 2.147328  | -2.270326 | -2.777136 |
| C | 2.187664  | -1.342907 | -0.922028 |
| N | 2.893960  | -0.628345 | 0.034521  |
| H | 3.977003  | -0.621705 | 0.134583  |
| C | 2.032313  | 0.146453  | 0.701577  |
| H | 2.302616  | 0.843041  | 1.483309  |

|   |           |           |           |
|---|-----------|-----------|-----------|
| N | 0.801945  | -0.052603 | 0.210106  |
| C | 0.884867  | -0.960743 | -0.808465 |
| H | 0.021496  | -1.256108 | -1.379210 |
| C | -1.246564 | 2.989214  | 0.887336  |
| O | -1.627383 | 0.588920  | 0.174288  |
| C | -2.844573 | 0.026239  | 0.112281  |
| C | -2.981062 | -1.301281 | 0.989998  |
| C | -1.789945 | -2.208141 | 0.777322  |
| O | -0.967727 | -2.287686 | 1.821095  |
| C | 0.144274  | -3.202327 | 1.697887  |
| H | -0.225715 | -4.211529 | 1.504234  |
| H | 0.812578  | -2.895416 | 0.892870  |
| H | 0.659445  | -3.171771 | 2.654419  |
| O | -1.601929 | -2.844596 | -0.261320 |
| H | -3.001049 | -1.006414 | 2.042296  |
| C | -4.287715 | -2.063914 | 0.672717  |
| N | -4.236614 | -2.449198 | -0.803182 |
| C | -5.137624 | -3.575321 | -1.173821 |
| H | -5.076001 | -3.731776 | -2.251572 |
| H | -4.805429 | -4.476523 | -0.658623 |
| H | -6.162147 | -3.343157 | -0.884425 |
| H | -3.253576 | -2.730320 | -0.992116 |
| C | -4.540225 | -1.118845 | -1.485904 |
| C | -5.733839 | -0.583854 | -0.666617 |
| C | -5.561046 | -1.199010 | 0.750899  |
| H | -5.460297 | -0.432305 | 1.520580  |
| H | -6.420175 | -1.818800 | 1.020340  |
| H | -6.687050 | -0.882793 | -1.112819 |
| H | -5.715940 | 0.506631  | -0.637323 |
| H | -4.788327 | -1.330809 | -2.530735 |
| C | -3.272863 | -0.269510 | -1.360824 |

|   |           |           |           |
|---|-----------|-----------|-----------|
| H | -2.439995 | -0.756616 | -1.883209 |
| H | -3.434474 | 0.691744  | -1.860165 |
| H | -4.362311 | -2.980804 | 1.251841  |
| H | -3.627303 | 0.691565  | 0.539366  |
| O | -2.307286 | 3.123445  | 1.484837  |
| C | -0.890461 | 3.623492  | -0.412348 |
| C | -0.875436 | 5.021078  | -0.432462 |
| H | -1.240260 | 5.575069  | 0.427442  |
| C | -0.328949 | 5.693496  | -1.522721 |
| H | -0.256345 | 6.772466  | -1.487234 |
| C | 0.153262  | 4.976351  | -2.619602 |
| H | 0.588334  | 5.505746  | -3.462797 |
| C | 0.083014  | 3.579467  | -2.620040 |
| H | 0.445778  | 3.010444  | -3.472138 |
| C | -0.416183 | 2.897315  | -1.510854 |
| H | -0.459640 | 1.815422  | -1.479260 |

TS2'

|   |           |           |           |
|---|-----------|-----------|-----------|
| F | 0.489263  | 2.465041  | 3.791514  |
| C | -0.306404 | 1.801533  | 2.683679  |
| H | 0.087250  | 0.803706  | 2.458494  |
| H | -1.375393 | 1.714443  | 2.888194  |
| O | -0.131154 | 2.510277  | 1.453331  |
| H | -0.416866 | 0.227379  | 0.347659  |
| F | 7.984950  | -1.266476 | -1.404391 |
| C | 7.792715  | -1.170726 | 0.120269  |
| H | 7.721104  | -2.180448 | 0.580404  |
| H | 8.643515  | -0.692804 | 0.627838  |
| C | 6.517089  | -0.446237 | 0.562133  |
| O | 5.460156  | -0.722518 | -0.089695 |
| O | 6.632790  | 0.347513  | 1.525137  |

|   |           |           |           |
|---|-----------|-----------|-----------|
| F | 2.991350  | -3.756379 | -1.387436 |
| C | 2.802068  | -2.298256 | -1.883864 |
| H | 3.770976  | -1.827251 | -2.116530 |
| H | 2.222209  | -2.283288 | -2.818675 |
| C | 2.153020  | -1.367773 | -0.956349 |
| N | 2.812317  | -0.636256 | 0.017957  |
| H | 3.879484  | -0.601448 | 0.140152  |
| C | 1.903512  | 0.110071  | 0.661302  |
| H | 2.142837  | 0.811494  | 1.448237  |
| N | 0.687410  | -0.118262 | 0.146719  |
| C | 0.837127  | -1.021365 | -0.870569 |
| H | 0.007457  | -1.352799 | -1.472608 |
| C | -1.217695 | 3.057459  | 0.896114  |
| O | -1.651735 | 0.622094  | 0.345937  |
| C | -2.840238 | -0.002588 | 0.186441  |
| C | -2.982010 | -1.346024 | 1.020006  |
| C | -1.788621 | -2.251404 | 0.802323  |
| O | -0.973861 | -2.345300 | 1.846322  |
| C | 0.154587  | -3.238888 | 1.702394  |
| H | -0.202560 | -4.252356 | 1.505908  |
| H | 0.804982  | -2.912677 | 0.890369  |
| H | 0.680859  | -3.205490 | 2.652359  |
| O | -1.594826 | -2.865373 | -0.249275 |
| H | -3.021219 | -1.081017 | 2.079670  |
| C | -4.288242 | -2.089208 | 0.651903  |
| N | -4.203396 | -2.443777 | -0.829291 |
| C | -5.110471 | -3.550145 | -1.244851 |
| H | -5.016213 | -3.693614 | -2.322074 |
| H | -4.809899 | -4.463429 | -0.731434 |
| H | -6.140212 | -3.305094 | -0.986214 |
| H | -3.219133 | -2.735020 | -0.998166 |

|   |           |           |           |
|---|-----------|-----------|-----------|
| C | -4.471469 | -1.095600 | -1.490358 |
| C | -5.684950 | -0.568210 | -0.694195 |
| C | -5.556385 | -1.214727 | 0.715040  |
| H | -5.473192 | -0.466052 | 1.504640  |
| H | -6.426783 | -1.833687 | 0.947426  |
| H | -6.626132 | -0.853088 | -1.173646 |
| H | -5.664580 | 0.521661  | -0.644016 |
| H | -4.688673 | -1.278975 | -2.547000 |
| C | -3.199354 | -0.259448 | -1.307978 |
| H | -2.356120 | -0.742641 | -1.816826 |
| H | -3.338999 | 0.713778  | -1.790072 |
| H | -4.382993 | -3.015585 | 1.211113  |
| H | -3.648037 | 0.636828  | 0.592516  |
| O | -2.285075 | 3.194859  | 1.480532  |
| C | -0.860421 | 3.671302  | -0.411207 |
| C | -0.849968 | 5.067614  | -0.456890 |
| H | -1.216984 | 5.635712  | 0.392697  |
| C | -0.299613 | 5.720040  | -1.556366 |
| H | -0.219590 | 6.797955  | -1.532687 |
| C | 0.179217  | 4.984899  | -2.642668 |
| H | 0.612909  | 5.500226  | -3.495164 |
| C | 0.110998  | 3.588196  | -2.618984 |
| H | 0.474115  | 3.004564  | -3.460834 |
| C | -0.380858 | 2.926201  | -1.494463 |
| H | -0.400669 | 1.844703  | -1.442102 |

INT2

|   |           |          |          |
|---|-----------|----------|----------|
| F | 0.508978  | 2.473552 | 3.793908 |
| C | -0.285578 | 1.835417 | 2.672515 |
| H | 0.092350  | 0.836399 | 2.431626 |
| H | -1.358521 | 1.771003 | 2.864098 |

|   |           |           |           |
|---|-----------|-----------|-----------|
| O | -0.083095 | 2.551199  | 1.445518  |
| H | -0.875448 | 0.276733  | 0.377197  |
| F | 7.962630  | -1.364299 | -1.380066 |
| C | 7.775920  | -1.262583 | 0.143991  |
| H | 7.686766  | -2.270090 | 0.606509  |
| H | 8.636968  | -0.799951 | 0.649377  |
| C | 6.513436  | -0.513076 | 0.580623  |
| O | 5.461850  | -0.752495 | -0.087944 |
| O | 6.639396  | 0.265502  | 1.556656  |
| F | 2.942028  | -3.806632 | -1.384979 |
| C | 2.759040  | -2.351780 | -1.898189 |
| H | 3.732093  | -1.891519 | -2.135144 |
| H | 2.182129  | -2.343913 | -2.835941 |
| C | 2.113689  | -1.414052 | -0.978051 |
| N | 2.777182  | -0.698643 | 0.000149  |
| H | 3.830488  | -0.664693 | 0.126322  |
| C | 1.860543  | 0.050197  | 0.641559  |
| H | 2.119431  | 0.739204  | 1.434248  |
| N | 0.636833  | -0.147296 | 0.140192  |
| C | 0.799652  | -1.046520 | -0.881429 |
| H | -0.018631 | -1.379377 | -1.501820 |
| C | -1.125874 | 3.169432  | 0.893553  |
| O | -1.794625 | 0.702878  | 0.542143  |
| C | -2.933395 | -0.017823 | 0.261737  |
| C | -3.038082 | -1.370719 | 1.044956  |
| C | -1.829111 | -2.264754 | 0.813146  |
| O | -1.024208 | -2.372122 | 1.855530  |
| C | 0.129398  | -3.236022 | 1.688736  |
| H | -0.210180 | -4.261190 | 1.521646  |
| H | 0.739824  | -2.899798 | 0.850134  |
| H | 0.683599  | -3.170771 | 2.620453  |



|   |           |           |           |
|---|-----------|-----------|-----------|
| O | -1.638875 | -2.856040 | -0.251411 |
| H | -3.094865 | -1.142998 | 2.112483  |
| C | -4.336206 | -2.102935 | 0.625661  |
| N | -4.215628 | -2.418008 | -0.860466 |
| C | -5.119389 | -3.508980 | -1.323013 |
| H | -4.995733 | -3.631608 | -2.399608 |
| H | -4.838061 | -4.433719 | -0.819499 |
| H | -6.154214 | -3.261796 | -1.087954 |
| H | -3.227315 | -2.712460 | -1.010891 |
| C | -4.462295 | -1.053577 | -1.492926 |
| C | -5.698006 | -0.546034 | -0.716173 |
| C | -5.605049 | -1.227839 | 0.680858  |
| H | -5.544802 | -0.500771 | 1.493235  |
| H | -6.480248 | -1.851808 | 0.875977  |
| H | -6.624436 | -0.822465 | -1.227176 |
| H | -5.686245 | 0.543096  | -0.642262 |
| H | -4.644735 | -1.203347 | -2.560446 |
| C | -3.196396 | -0.218937 | -1.249753 |
| H | -2.333441 | -0.686565 | -1.738763 |
| H | -3.322779 | 0.767514  | -1.707289 |
| H | -4.439193 | -3.040117 | 1.161247  |
| H | -3.759999 | 0.591362  | 0.647595  |
| O | -2.204093 | 3.333599  | 1.451071  |
| C | -0.741240 | 3.747599  | -0.417720 |
| C | -0.750301 | 5.140288  | -0.514557 |
| H | -1.138003 | 5.733695  | 0.307821  |
| C | -0.180113 | 5.756227  | -1.623252 |
| H | -0.090652 | 6.831945  | -1.622468 |
| C | 0.312183  | 4.988427  | -2.680441 |
| H | 0.751784  | 5.478013  | -3.545020 |
| C | 0.258858  | 3.592834  | -2.607760 |

|       |           |           |           |
|-------|-----------|-----------|-----------|
| H     | 0.633877  | 2.982811  | -3.424621 |
| C     | -0.226081 | 2.967252  | -1.459832 |
| H     | -0.187678 | 1.888791  | -1.357901 |
| INT2' |           |           |           |
| F     | -2.428102 | -0.720229 | 3.501962  |
| C     | -2.561661 | -1.528138 | 2.211763  |
| H     | -1.673736 | -2.138688 | 1.997599  |
| H     | -3.446264 | -2.170093 | 2.171362  |
| O     | -2.573589 | -0.633111 | 1.101895  |
| C     | -3.738234 | -0.386331 | 0.489780  |
| O     | -4.771125 | -0.992491 | 0.743930  |
| C     | -3.626718 | 0.798333  | -0.387842 |
| C     | -4.765687 | 1.590071  | -0.552420 |
| H     | -5.705916 | 1.255799  | -0.128314 |
| C     | -4.668456 | 2.812678  | -1.210419 |
| H     | -5.541954 | 3.443470  | -1.304236 |
| C     | -3.437313 | 3.237557  | -1.708778 |
| H     | -3.371397 | 4.186615  | -2.229113 |
| C     | -2.294093 | 2.453043  | -1.535453 |
| H     | -1.326249 | 2.811641  | -1.868542 |
| C     | -2.387102 | 1.228054  | -0.885856 |
| H     | -1.508685 | 0.611102  | -0.738072 |
| F     | 6.066461  | 2.199455  | -0.651176 |
| C     | 5.774573  | 2.043471  | 0.852747  |
| H     | 6.436591  | 1.286793  | 1.326796  |
| H     | 5.990839  | 2.954657  | 1.436837  |
| C     | 4.362399  | 1.589835  | 1.244675  |
| O     | 4.007947  | 1.866529  | 2.416005  |
| O     | 3.683598  | 0.974159  | 0.369370  |
| F     | 4.154334  | -2.668117 | -1.794563 |

|   |           |           |           |
|---|-----------|-----------|-----------|
| C | 3.039485  | -1.613115 | -1.984372 |
| H | 3.426692  | -0.590367 | -1.842401 |
| H | 2.656892  | -1.654529 | -3.016523 |
| C | 1.917780  | -1.753532 | -1.039814 |
| N | 1.843242  | -1.025067 | 0.128695  |
| H | 2.507318  | -0.259688 | 0.396067  |
| C | 0.733997  | -1.430948 | 0.784256  |
| H | 0.427760  | -0.996764 | 1.726682  |
| N | 0.082331  | -2.388434 | 0.127234  |
| C | 0.829473  | -2.593828 | -1.012755 |
| H | 0.531253  | -3.307593 | -1.770787 |
| O | -2.201197 | -1.960630 | -1.628447 |
| H | -1.662951 | -1.368880 | -2.175312 |
| H | -1.589190 | -2.187493 | -0.894644 |

TS3

|   |           |           |           |
|---|-----------|-----------|-----------|
| F | -2.409061 | -0.820376 | 3.572170  |
| C | -2.574977 | -1.530134 | 2.228908  |
| H | -1.741758 | -2.247245 | 2.047894  |
| H | -3.508958 | -2.094423 | 2.127615  |
| O | -2.483172 | -0.584908 | 1.202917  |
| C | -3.511183 | -0.622602 | 0.203568  |
| O | -4.605819 | -1.150604 | 0.516720  |
| C | -3.431744 | 0.733570  | -0.475392 |
| C | -4.585026 | 1.511952  | -0.549517 |
| H | -5.515565 | 1.091839  | -0.185280 |
| C | -4.532317 | 2.810126  | -1.061118 |
| H | -5.433880 | 3.410462  | -1.111731 |
| C | -3.315438 | 3.342973  | -1.481416 |
| H | -3.279707 | 4.345894  | -1.892121 |
| C | -2.149373 | 2.581432  | -1.379017 |

|   |           |           |           |
|---|-----------|-----------|-----------|
| H | -1.187162 | 3.014463  | -1.635257 |
| C | -2.212203 | 1.275452  | -0.903543 |
| H | -1.304248 | 0.686137  | -0.837099 |
| F | 6.167083  | 1.968686  | -0.548399 |
| C | 5.897805  | 1.674205  | 0.944140  |
| H | 6.517947  | 0.827727  | 1.313787  |
| H | 6.183129  | 2.504390  | 1.610023  |
| C | 4.464740  | 1.271929  | 1.319342  |
| O | 4.066215  | 1.628489  | 2.453277  |
| O | 3.809484  | 0.600654  | 0.461995  |
| F | 4.063621  | -2.634113 | -1.893730 |
| C | 3.037404  | -1.485898 | -2.015928 |
| H | 3.497557  | -0.528545 | -1.722757 |
| H | 2.726079  | -1.379042 | -3.064205 |
| C | 1.815993  | -1.574666 | -1.195883 |
| N | 1.736520  | -1.046904 | 0.083337  |
| H | 2.506548  | -0.443887 | 0.495865  |
| C | 0.475055  | -1.177401 | 0.516577  |
| H | 0.103590  | -0.821109 | 1.465257  |
| N | -0.263067 | -1.785392 | -0.419355 |
| C | 0.560689  | -2.031171 | -1.491815 |
| H | 0.191369  | -2.468540 | -2.407009 |
| O | -2.714206 | -1.636271 | -0.956103 |
| H | -3.258673 | -2.435478 | -0.865065 |
| H | -1.421812 | -1.801831 | -0.542037 |

### INT3

|   |           |           |          |
|---|-----------|-----------|----------|
| F | -2.413653 | -0.800478 | 3.559648 |
| C | -2.581200 | -1.530376 | 2.221001 |
| H | -1.778358 | -2.298302 | 2.085480 |
| H | -3.537801 | -2.055679 | 2.113858 |

|   |           |           |           |
|---|-----------|-----------|-----------|
| O | -2.427078 | -0.632757 | 1.169562  |
| C | -3.495042 | -0.665038 | 0.133271  |
| O | -4.616458 | -1.117368 | 0.523924  |
| C | -3.399339 | 0.732399  | -0.482543 |
| C | -4.545475 | 1.522290  | -0.539529 |
| H | -5.474758 | 1.099462  | -0.175314 |
| C | -4.489629 | 2.824550  | -1.040804 |
| H | -5.388987 | 3.429523  | -1.083360 |
| C | -3.273329 | 3.355026  | -1.466446 |
| H | -3.234871 | 4.359718  | -1.872565 |
| C | -2.111869 | 2.585494  | -1.377794 |
| H | -1.148397 | 3.015866  | -1.635126 |
| C | -2.181015 | 1.273986  | -0.916557 |
| H | -1.273126 | 0.681987  | -0.866639 |
| F | 6.154126  | 1.954427  | -0.556177 |
| C | 5.879136  | 1.679983  | 0.938435  |
| H | 6.508763  | 0.849708  | 1.328130  |
| H | 6.147763  | 2.523739  | 1.594556  |
| C | 4.453351  | 1.259973  | 1.317013  |
| O | 4.061908  | 1.593655  | 2.458584  |
| O | 3.797347  | 0.594994  | 0.452459  |
| F | 4.037432  | -2.670446 | -1.894942 |
| C | 3.023429  | -1.511598 | -2.019550 |
| H | 3.493676  | -0.555359 | -1.737406 |
| H | 2.706126  | -1.408221 | -3.066219 |
| C | 1.807011  | -1.576556 | -1.189340 |
| N | 1.743480  | -1.033382 | 0.086409  |
| H | 2.527367  | -0.425230 | 0.487074  |
| C | 0.490035  | -1.142165 | 0.536250  |
| H | 0.116388  | -0.773559 | 1.479233  |
| N | -0.253885 | -1.754702 | -0.393647 |

|     |           |           |           |
|-----|-----------|-----------|-----------|
| C   | 0.547651  | -2.023291 | -1.476981 |
| H   | 0.161179  | -2.463031 | -2.382978 |
| O   | -2.842794 | -1.609043 | -0.927653 |
| H   | -3.457434 | -2.361009 | -0.894794 |
| H   | -1.321537 | -1.798452 | -0.433586 |
| TS4 |           |           |           |
| F   | -2.396462 | -0.878942 | 3.498233  |
| C   | -2.645576 | -1.636589 | 2.169873  |
| H   | -2.033087 | -2.573916 | 2.117504  |
| H   | -3.688116 | -1.965216 | 2.046723  |
| O   | -2.292518 | -0.891192 | 1.058915  |
| C   | -3.596947 | -0.703045 | -0.137502 |
| O   | -4.640356 | -1.121891 | 0.408594  |
| C   | -3.416811 | 0.760370  | -0.482462 |
| C   | -4.539392 | 1.585332  | -0.406044 |
| H   | -5.468014 | 1.158232  | -0.046195 |
| C   | -4.471241 | 2.918089  | -0.811310 |
| H   | -5.355492 | 3.545379  | -0.771105 |
| C   | -3.262727 | 3.439979  | -1.266411 |
| H   | -3.221066 | 4.460949  | -1.625523 |
| C   | -2.118446 | 2.640504  | -1.282878 |
| H   | -1.159852 | 3.069144  | -1.557961 |
| C   | -2.200005 | 1.298111  | -0.922257 |
| H   | -1.314067 | 0.673934  | -0.972986 |
| F   | 6.146888  | 1.950282  | -0.611974 |
| C   | 5.920279  | 1.696303  | 0.891423  |
| H   | 6.588683  | 0.899972  | 1.286308  |
| H   | 6.159512  | 2.560757  | 1.532430  |
| C   | 4.525015  | 1.214955  | 1.277398  |
| O   | 4.117578  | 1.493857  | 2.426989  |

|   |           |           |           |
|---|-----------|-----------|-----------|
| O | 3.908982  | 0.552899  | 0.383522  |
| F | 3.906972  | -2.678742 | -2.033067 |
| C | 2.837981  | -1.565462 | -2.165133 |
| H | 3.308947  | -0.575766 | -2.037489 |
| H | 2.399398  | -1.562369 | -3.173525 |
| C | 1.738189  | -1.570089 | -1.173788 |
| N | 1.936124  | -1.074419 | 0.106049  |
| H | 2.786531  | -0.486987 | 0.403160  |
| C | 0.773287  | -1.104266 | 0.753336  |
| H | 0.587361  | -0.727059 | 1.748982  |
| N | -0.171328 | -1.617614 | -0.034975 |
| C | 0.407947  | -1.903000 | -1.251815 |
| H | -0.167085 | -2.273575 | -2.086362 |
| O | -3.050677 | -1.476028 | -1.200300 |
| H | -3.521732 | -2.323733 | -1.124784 |
| H | -1.225451 | -1.457220 | 0.308249  |

PD

|   |           |           |           |
|---|-----------|-----------|-----------|
| F | -2.429838 | -0.722778 | 3.653709  |
| C | -2.791187 | -1.226615 | 2.260434  |
| H | -3.174152 | -2.265942 | 2.267548  |
| H | -3.558735 | -0.577345 | 1.815313  |
| O | -1.724999 | -1.117938 | 1.372650  |
| C | -3.099507 | -0.777021 | -0.862158 |
| O | -3.860617 | -1.672625 | -0.524847 |
| C | -3.410126 | 0.670876  | -0.767712 |
| C | -4.664308 | 1.051526  | -0.272342 |
| H | -5.311135 | 0.293333  | 0.154258  |
| C | -5.087823 | 2.371455  | -0.381071 |
| H | -6.062142 | 2.672554  | -0.008799 |
| C | -4.259361 | 3.300539  | -1.011843 |

|   |           |           |           |
|---|-----------|-----------|-----------|
| H | -4.653840 | 4.280812  | -1.246968 |
| C | -2.954439 | 2.961828  | -1.374895 |
| H | -2.280933 | 3.716350  | -1.772440 |
| C | -2.521834 | 1.645346  | -1.247277 |
| H | -1.516723 | 1.361839  | -1.537047 |
| F | 5.814235  | 2.512686  | -0.873280 |
| C | 5.615207  | 2.280718  | 0.636010  |
| H | 6.331628  | 1.527273  | 1.032345  |
| H | 5.836973  | 3.172071  | 1.247456  |
| C | 4.251292  | 1.749856  | 1.091878  |
| O | 3.952673  | 1.989788  | 2.287088  |
| O | 3.561389  | 1.113281  | 0.239774  |
| F | 3.991337  | -2.598323 | -1.957328 |
| C | 2.740201  | -1.691969 | -2.065039 |
| H | 3.015806  | -0.624640 | -2.070583 |
| H | 2.209957  | -1.870133 | -3.014344 |
| C | 1.815926  | -1.869947 | -0.928855 |
| N | 1.904064  | -1.080539 | 0.197890  |
| H | 2.511842  | -0.232821 | 0.313886  |
| C | 1.052146  | -1.585677 | 1.107510  |
| H | 0.846485  | -1.099853 | 2.049281  |
| N | 0.413253  | -2.667075 | 0.664192  |
| C | 0.889266  | -2.843070 | -0.618031 |
| H | 0.557551  | -3.661678 | -1.247304 |
| O | -1.918462 | -1.003169 | -1.471027 |
| H | -1.686524 | -1.939812 | -1.342413 |
| H | -1.201471 | -1.944732 | 1.288569  |



## Complete citations of references 45 and 48

45. Frisch, M. J.; Trucks, G. W.; Schlegel, H. B.; Scuseria, G. E.; Robb, M. A.; Cheeseman, J. R.; Montgomery, J., J. A.; Vreven, T.; Kudin, K. N.; Burant, J. C.; Millam, J. M.; Iyengar, S. S.; Tomasi, J.; Barone, V.; Mennucci, B.; Cossi, M.; Scalmani, G.; Rega, N.; Petersson, G. A.; Nakatsuji, H.; Hada, M.; Ehara, M.; Toyota, K.; Fukuda, R.; Hasegawa, J.; Ishida, M.; Nakajima, T.; Honda, Y.; Kitao, O.; Nakai, H.; Klene, M.; Li, X.; Knox, J. E.; Hratchian, H. P.; Cross, J. B.; Bakken, V.; Adamo, C.; Jaramillo, J.; Gomperts, R.; Stratmann, R. E.; Yazyev, O.; Austin, A. J.; Cammi, R.; Pomelli, C.; Ochterski, J. W.; Ayala, P. Y.; Morokuma, K.; Voth, G. A.; Salvador, P.; Dannenberg, J. J.; Zakrzewski, V. G.; Dapprich, S.; Daniels, A. D.; Strain, M. C.; Farkas, O.; Malick, D. K.; Rabuck, A. D.; Raghavachari, K.; Foresman, J. B.; Ortiz, J. V.; Cui, Q.; Baboul, A. G.; Clifford, S.; Cioslowski, J.; Stefanov, B. B.; Liu, G.; Liashenko, A.; Piskorz, P.; Komaromi, I.; Martin, R. L.; Fox, D. J.; Keith, T.; Al-Laham, M. A.; Peng, C. Y.; Nanayakkara, A.; Challacombe, M.; Gill, P. M. W.; Johnson, B.; Chen, W.; Wong, M. W.; Gonzalez, C.; Pople, J. A., *Gaussian 03*, Revision C.02, Gaussian, Inc., Wallingford CT, 2004.

48. Case, D. A.; Darden, T. A.; T.E. Cheatham, I.; Simmerling, C. L.; Wang, J.; Duke, R. E.; Luo, R.; Merz, K. M.; Wang, B.; Pearlman, D. A.; Crowley, M.; Brozell, S.; Tsui, V.; Gohlke, H.; Mongan, J.; Hornak, V.; Cui, G.; Beroza, P.; Schafmeister, C.; Caldwell, J. W.; Ross, W. S.; Kollman, P. A., *AMBER 8*, University of California, San Francisco, 2004.
